# Supplementary material for: Multi-Component One-Pot Synthesis and Antimicrobial Activities of 3-Methyl-1,4-diphenyl-7-thioxo-4,6,8,9-tetrahydro-pyrazolo[5,4-b]pyrimidino[5,4-e]pyridine-5-one and Related Derivatives
Source: Molecules. 2012 Dec 6;17(12):14464–83. doi: 10.3390/molecules171214464 (PMC6268947; doi:10.3390/molecules171214464)

# <sup>1</sup>H-NMR spectrum of compound 6

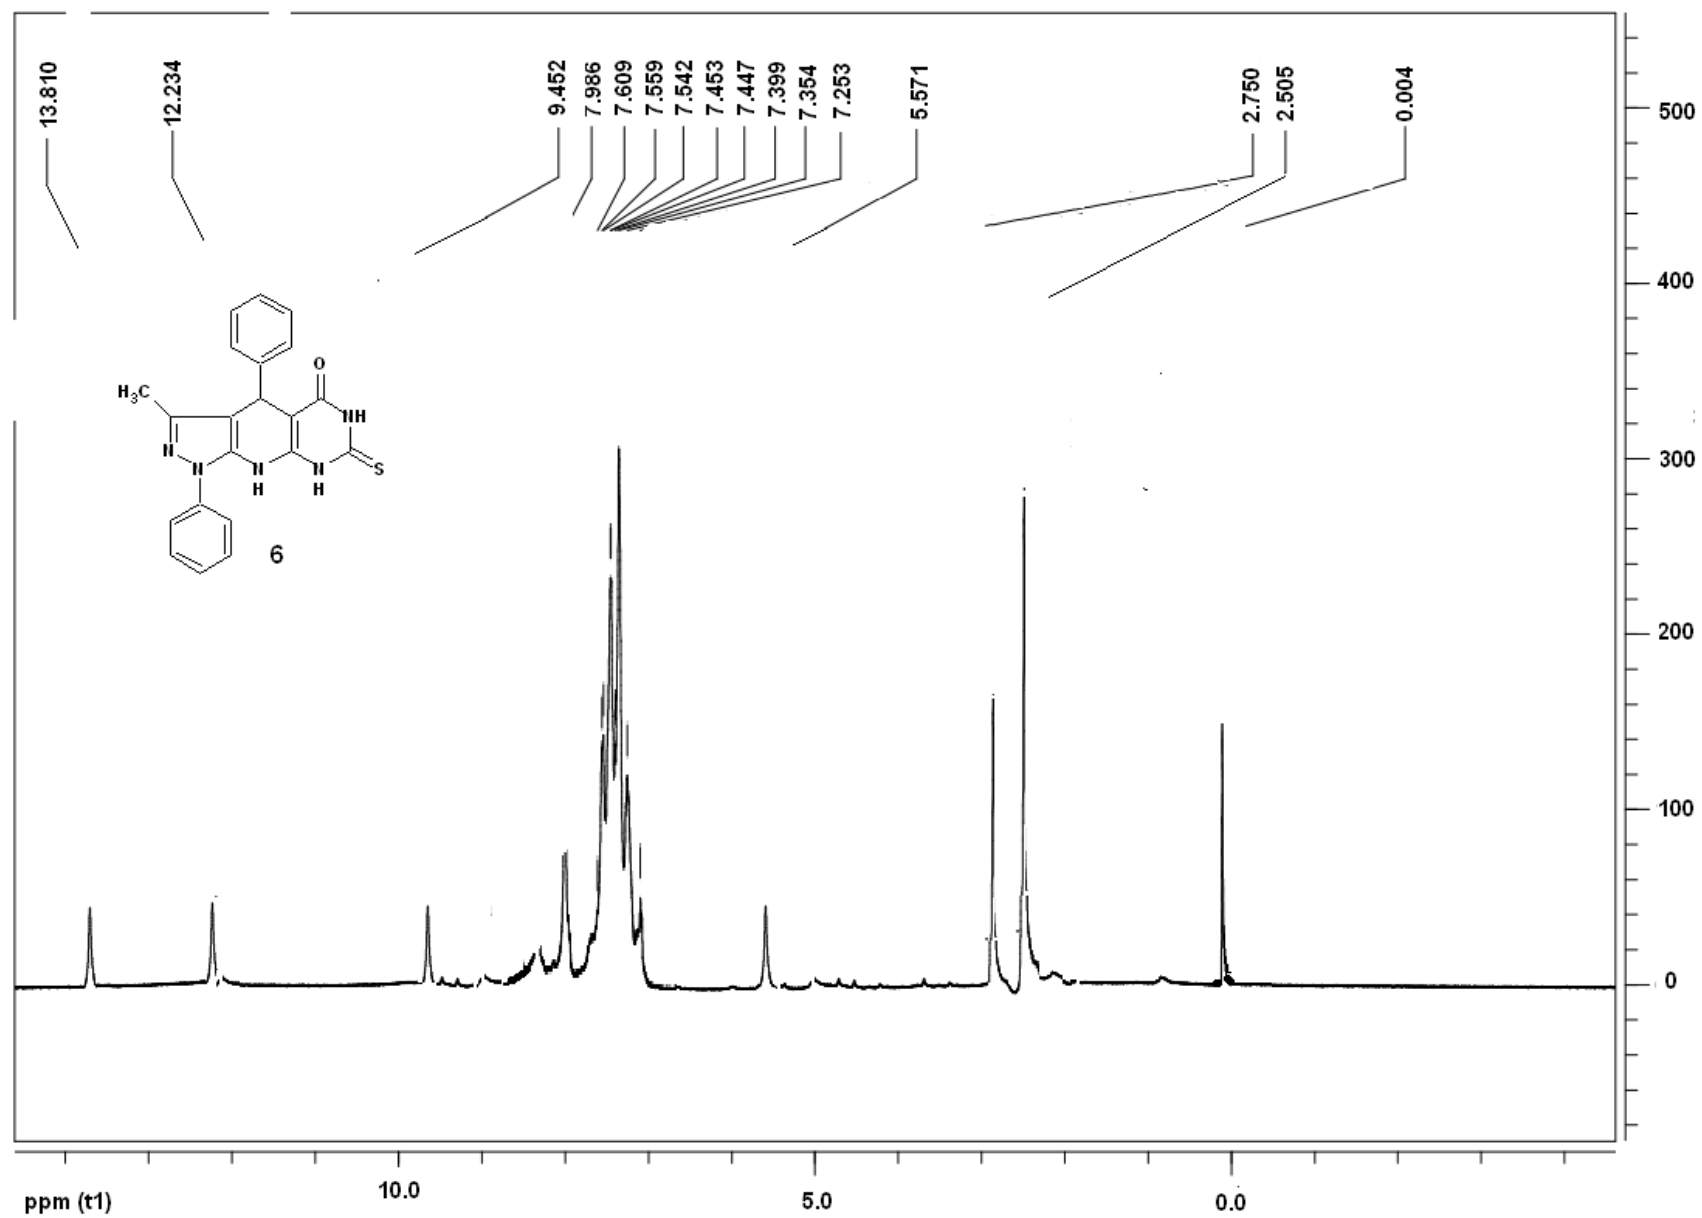

**<sup>1</sup>H-NMR spectrum of compound 7d**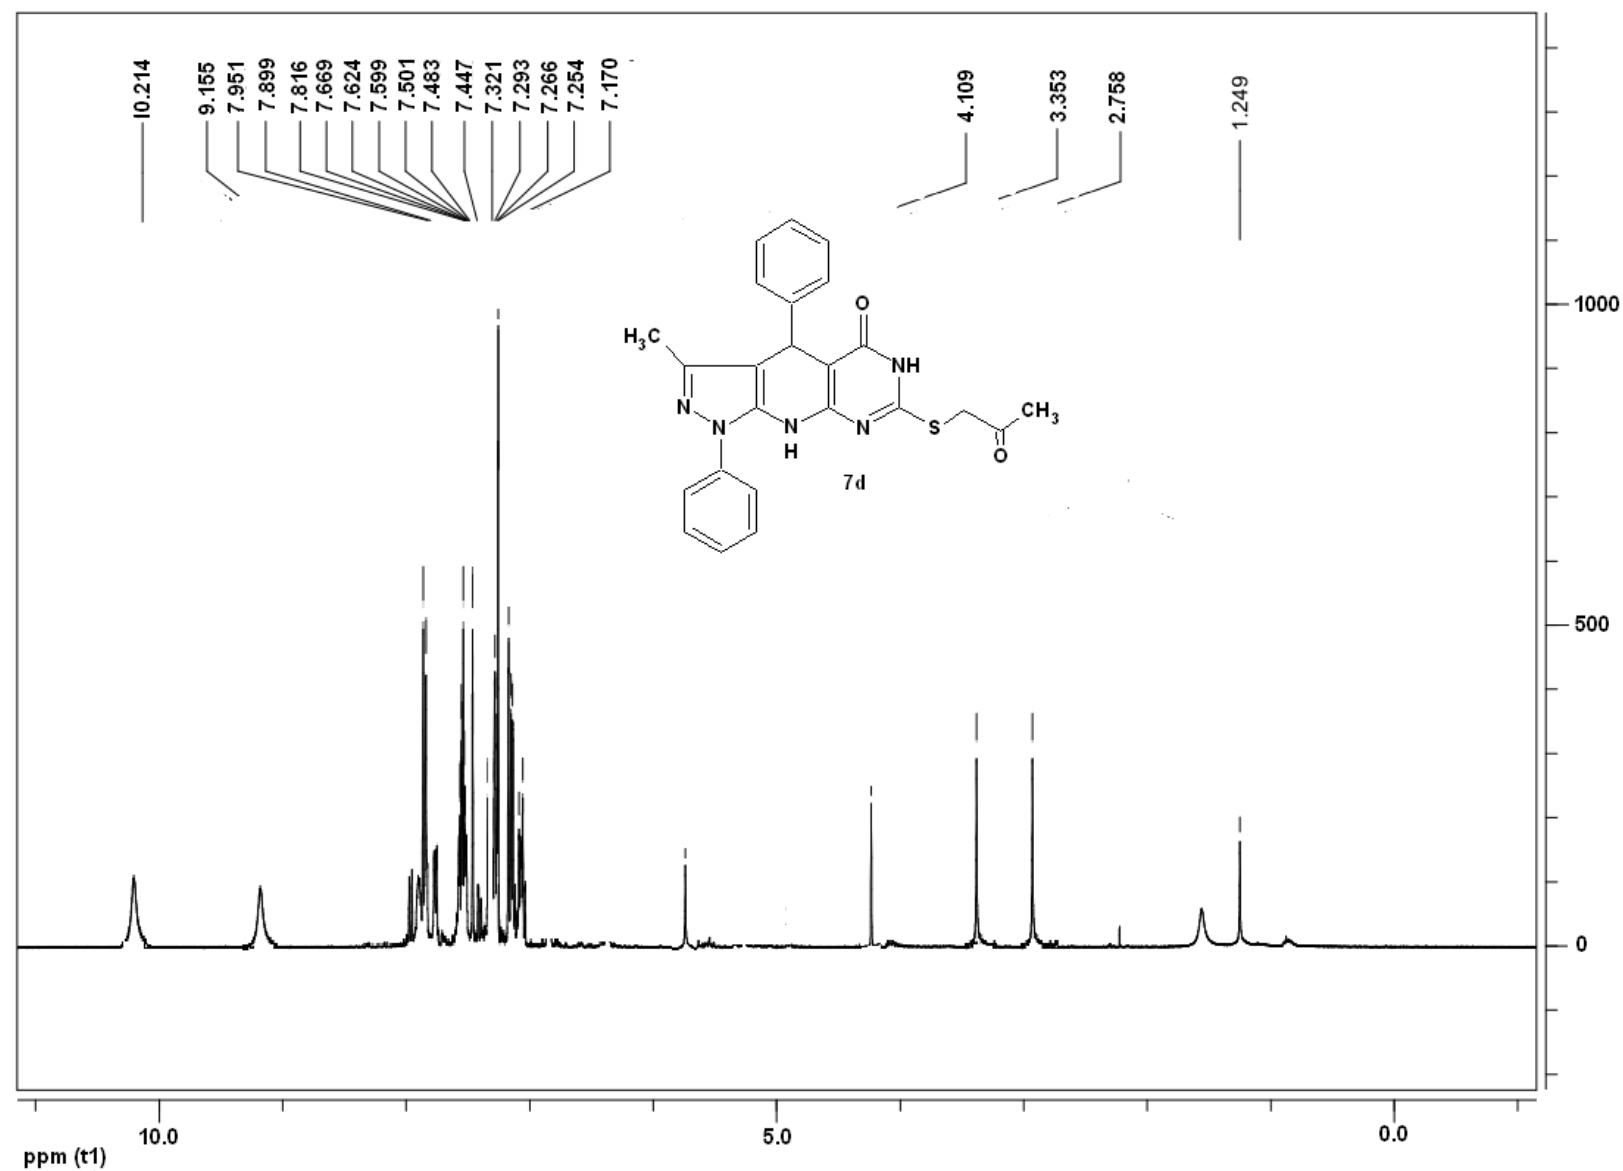

### IR spectrum of compound 7f

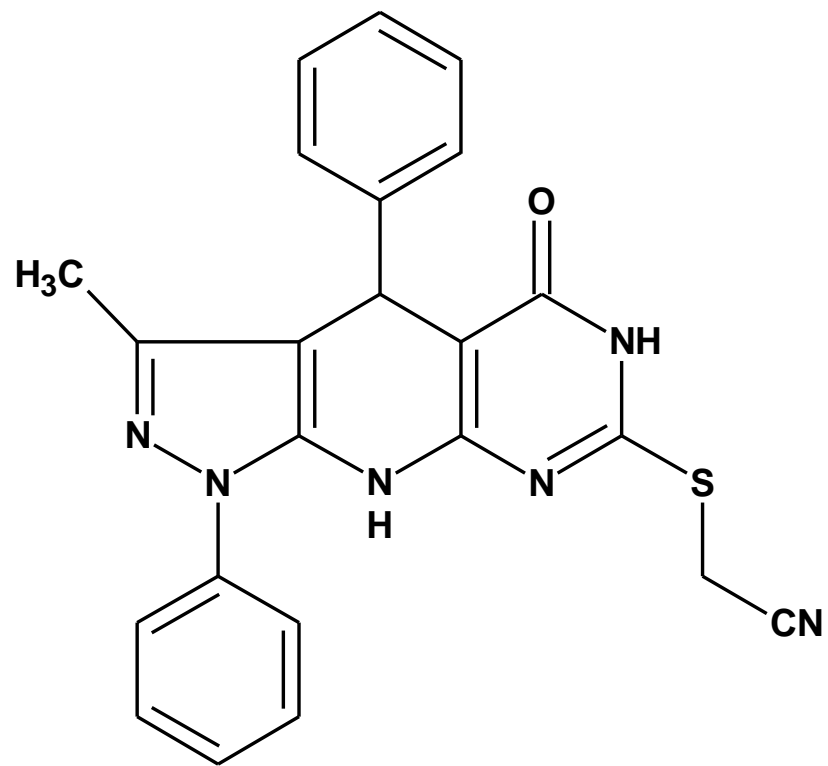

**7f**

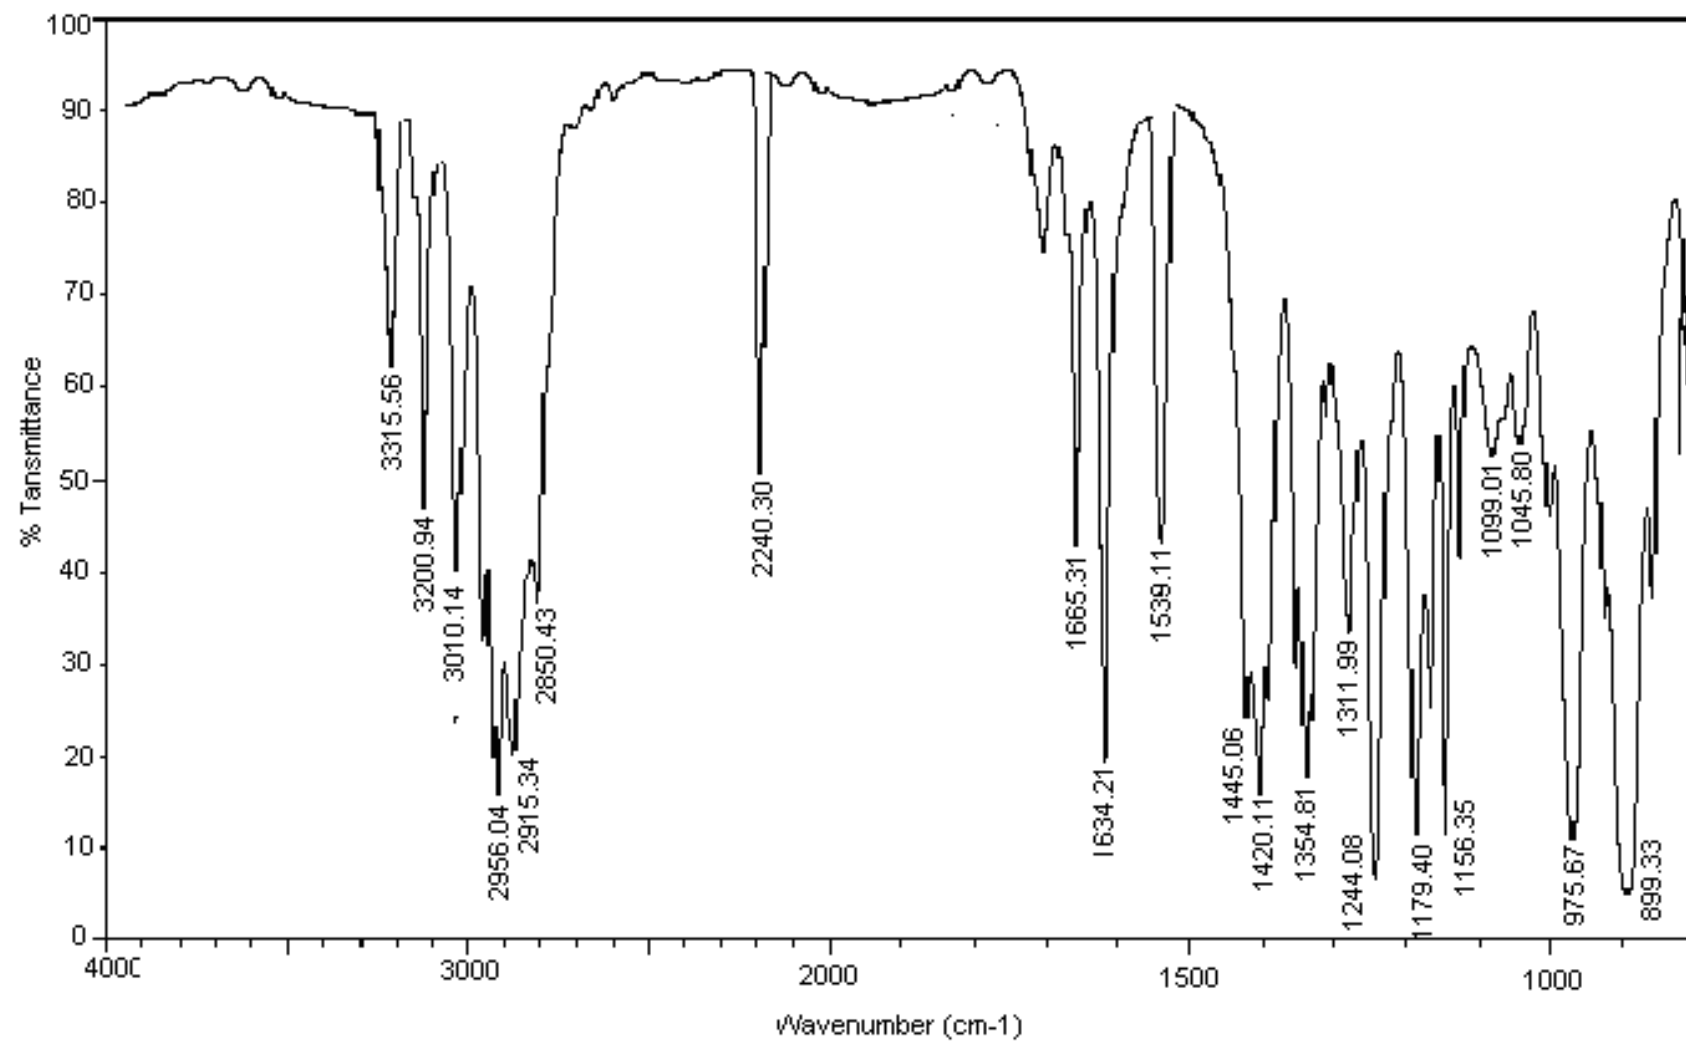

$^{13}\text{C}$ -NMR spectrum of compound 9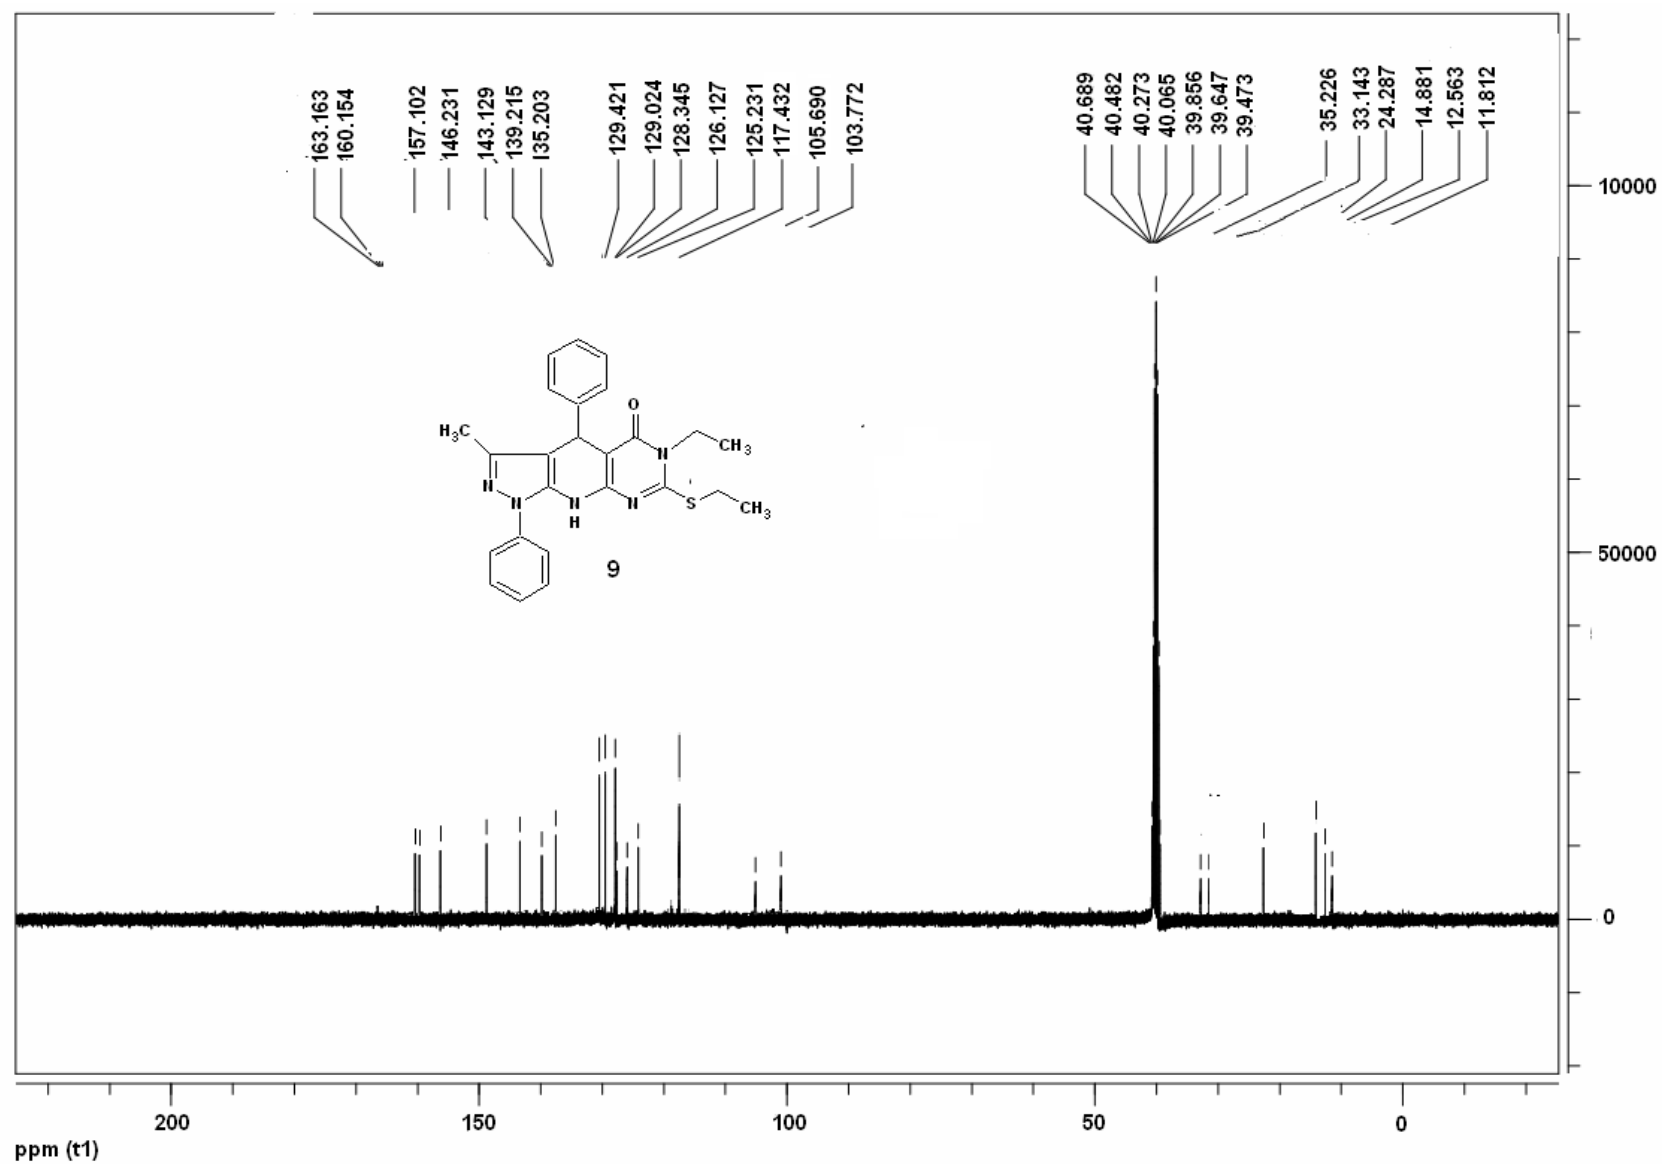

<sup>1</sup>H-NMR spectrum of compound 11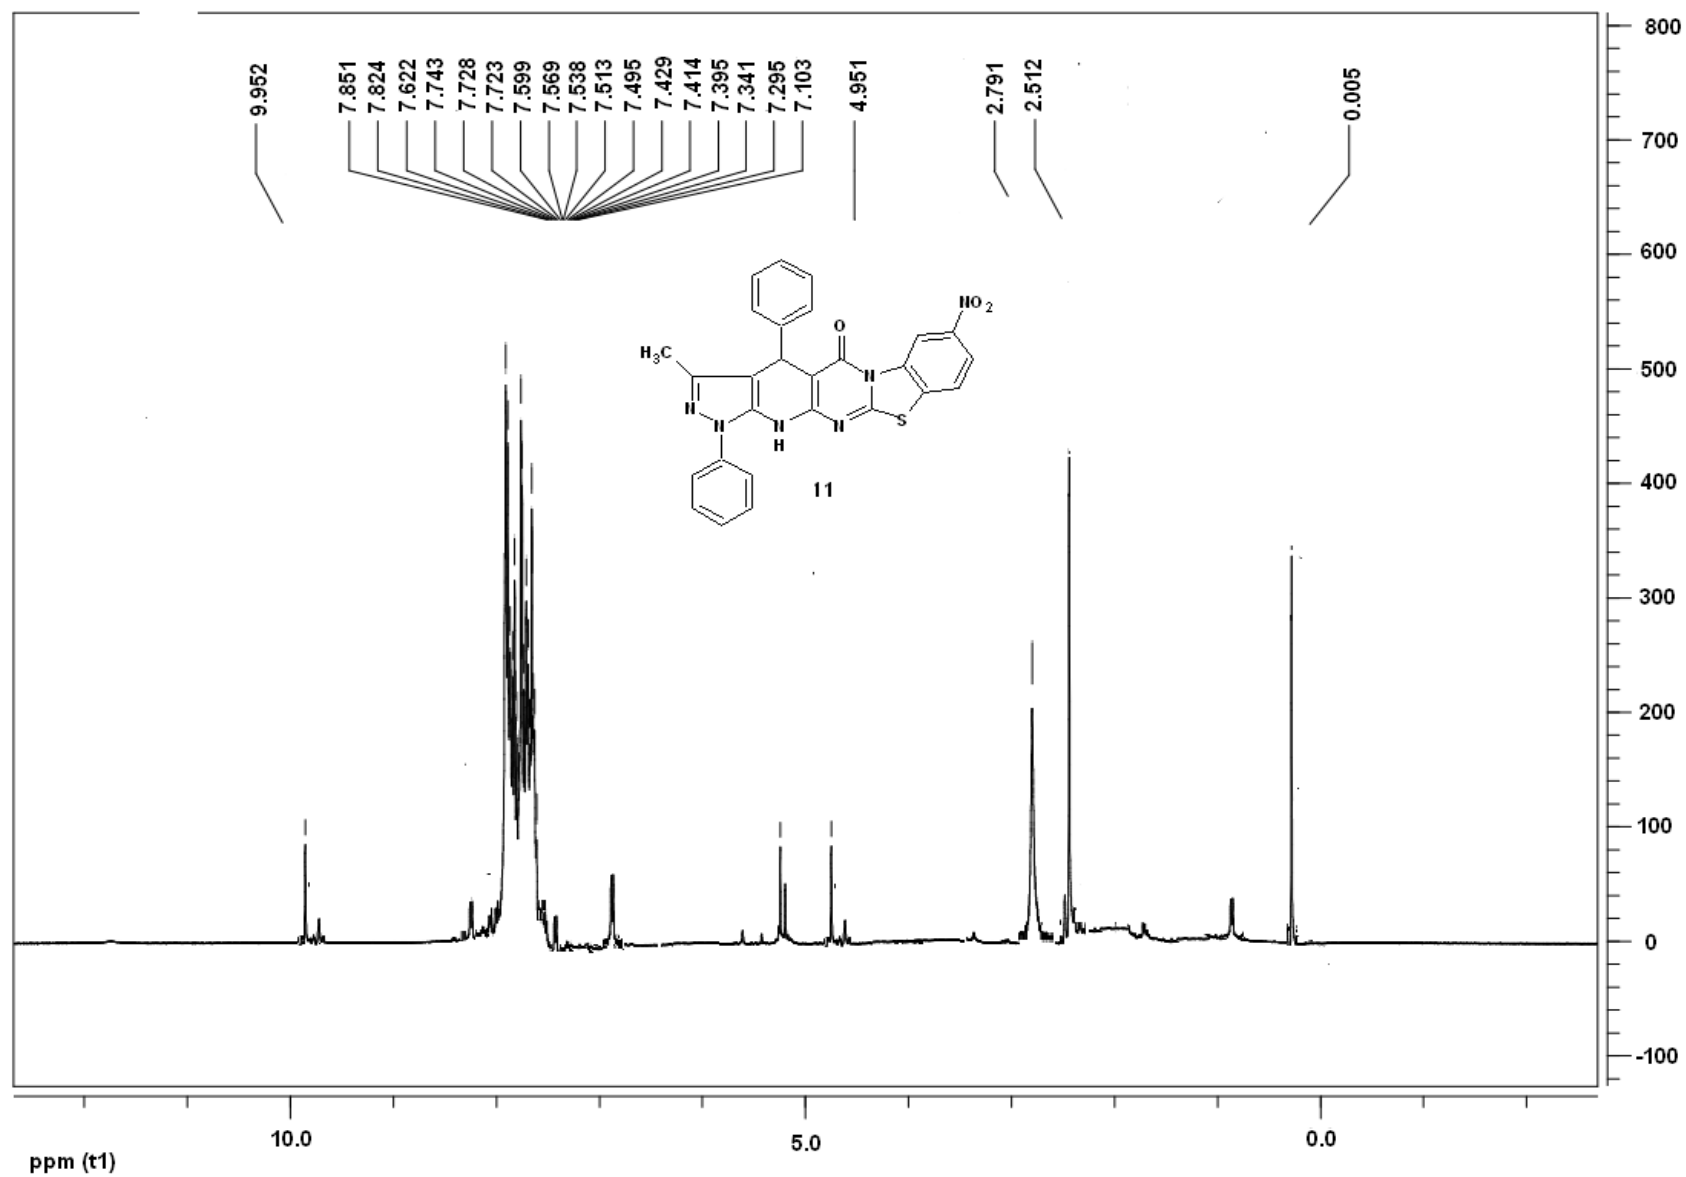

## Mass spectrum of compound 11

Assiut University Central lab

8/28/2011 12:55:13 PM

Page 1

File: 11ST

Date Run : 8/28/2011 Time Run: 12:31:04

Sample: Dr/ Talaat El-Emary

Instrument: JEOL JMS600

Inlet: My Inlet

Ionization mode: EI+

Run By: Souzan

Printed by: Souzan

Scan: 144

R.T.: 6:00.885

Base: 506; 38.1%FS TIC: 2533

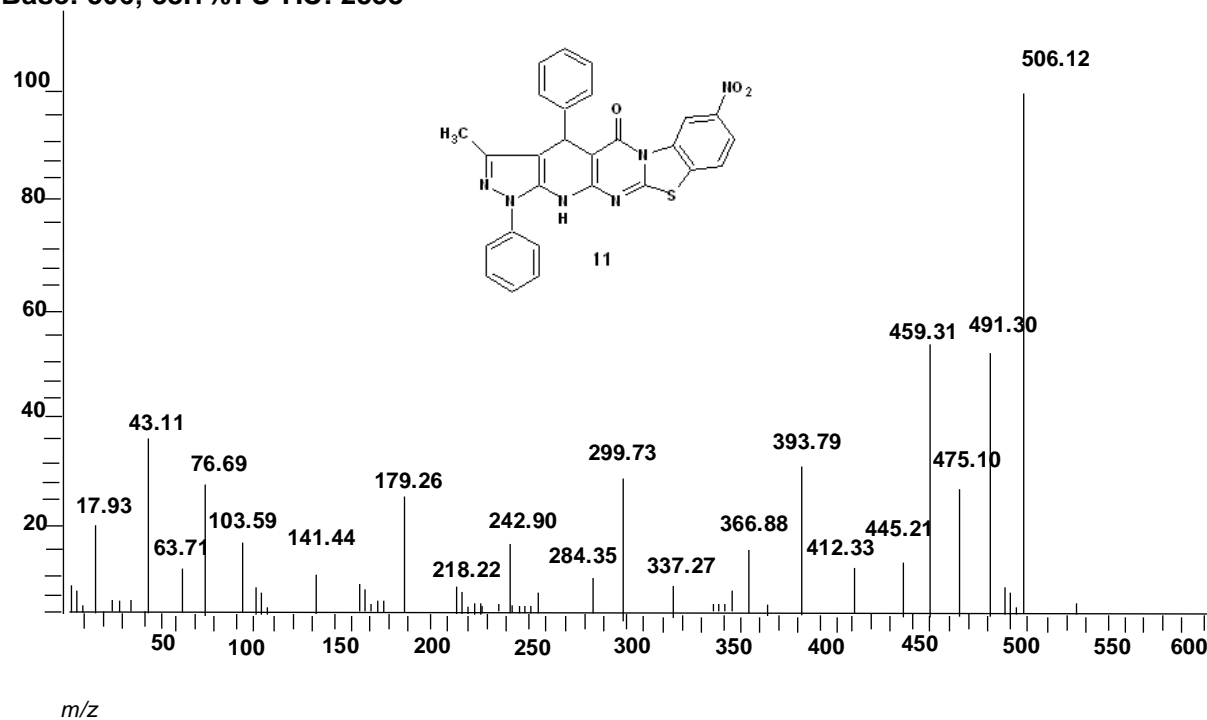

<sup>13</sup>C-NMR spectrum of compound 20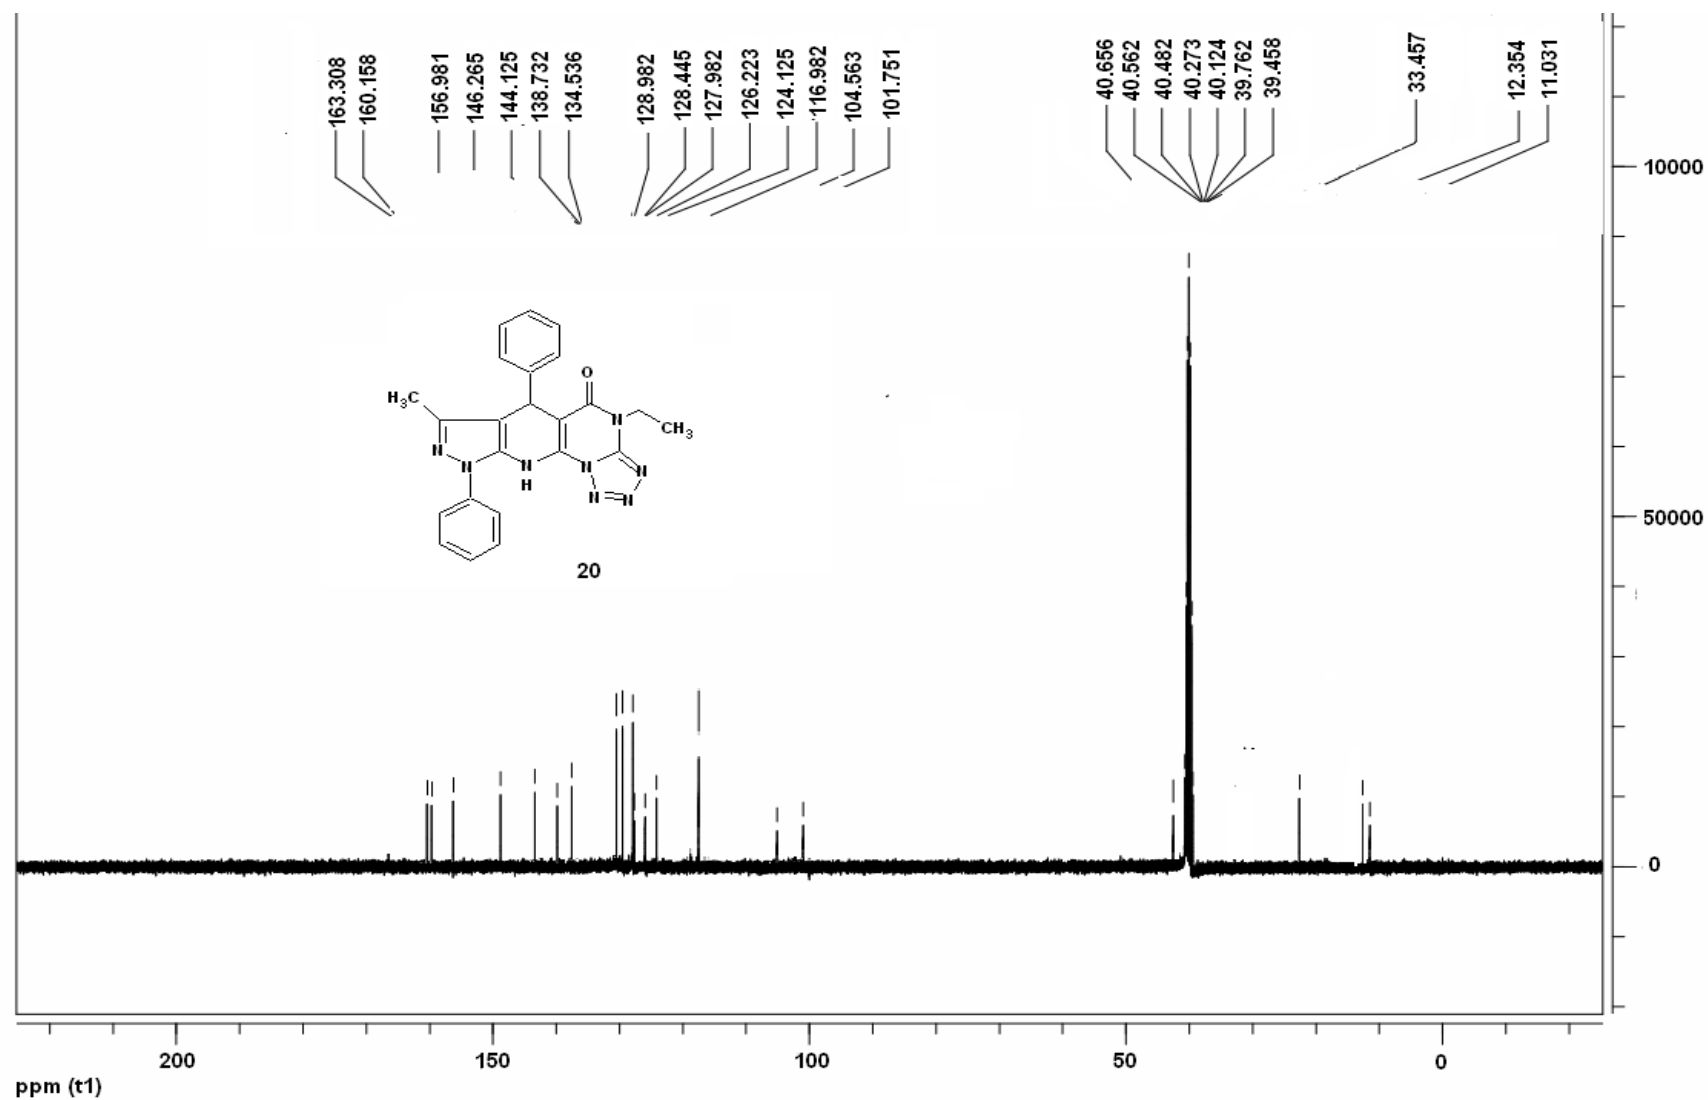

Supplement: Supplementary file 1 [file molecules-17-14464-s001.pdf]
